# Supplementary material for: The Role of Phialocephala fortinii in Improving Plants’ Phosphorus Nutrition: New Puzzle Pieces
Source: MDPI journal article supplement (doi:10.3390/jof8111225), 2022-11-21
Supplement: s1 [file s1]

**Supplementary Table S1.** Characteristics of isolates – representatives of slow-growing dark septate endophytes morphotypes from *V. vitis-idaea* roots (DSE1–5 isolates)

| Isolate – morphotype representative | Average growth rate, cm/day | Colony appearance                                                                                                             | Accession number                                                                  | Accordance % |
|-------------------------------------|-----------------------------|-------------------------------------------------------------------------------------------------------------------------------|-----------------------------------------------------------------------------------|--------------|
| DSE1                                | 0.3 ± 0.02                  | Olive-brown<br>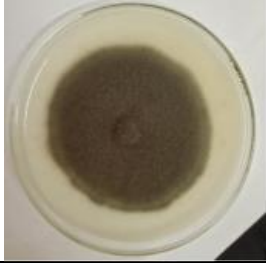                             | <i>Phialocephala fortinii</i><br>KJ817297.1                                       | 99.64        |
| DSE2                                | 0.24 ± 0.01                 | Dark brown<br>                              | <i>Phialocephala fortinii</i> :<br>MT276008.1,<br>MH931279.1,<br>LC131022.1, etc. | 100          |
| DSE3                                | 0.24 ± 0.03                 | Dark brown<br>Abundant areal mycelium<br> | <i>Phialocephala bamuru</i><br>MG195534.1                                         | 99.64        |
| DSE4                                | 0.24 ± 0.01                 | Dark brown<br>                            | <i>Phialocephala fortinii</i><br>MT276008.1                                       | 99.82        |
| DSE5                                | 0.16 ± 0.01                 | Dark brown<br>                            | <i>Acephala</i> sp.<br>HQ889709.1                                                 | 98.51        |
